# Supplementary material
Source: PubMed Central journal article supplement (PMC7071984)
Supplement: NIHMS1547860-supplement-7.pdf [file NIHMS1547860-supplement-7.pdf]

| Antibody         | Conjugation    | Emission | Volume (μL) | Catalog          | Company              | Splenocyte | Peritoneum |
|------------------|----------------|----------|-------------|------------------|----------------------|------------|------------|
| CD3              | AF700          | 700      | 0.3         | 100215           | Biolegend            | X          | X          |
| CD4              | FITC           | 525      | 0.125       | 100405           | Biolegend            | X          | X          |
| CD8a             | BV650          | 650      | 0.8         | 100741           | BioLegend            | X          |            |
| CD44             | PE             | 578      | 3.00        | 103023           | Biolegend            | X          | X          |
| CD62L            | APC            | 661      | 0.8         | 104411           | Biolegend            | X          | X          |
| CD19             | PerCP<br>Cy5.5 | 676      | 0.625       | 115533           | BioLegend            | X          | X          |
| CD49b            | PE-Cy7         | 785      | 0.625       | 108921           | BioLegend            | X          |            |
| CD11b            | BV785          | 785      | 0.625       | 101243           | Biolegend            | X          | X          |
| CD25             | BV605          | 605      | 0.930       | 102035           | BioLegend            | X          |            |
| CD11c            | PE-Dazzle      | 594      | 0.313       | 117347           | BioLegend            |            | X          |
| F4/80            | BV421          | 421      | 3.00        | 123131           | BioLegend            |            | X          |
| Ghost<br>Dye Red | APC-Cy7        | 780      | 1           | 13-0865-<br>T100 | Tonbo<br>Biosciences |            | X          |
| Zombie<br>Violet | BV421          | 421      | 1           | 423113           | Biolegend            | X          |            |

**Table S1: Splenocyte and Peritoneum Antibody Panels**
